# Supplementary material for: Smart-RRBS for single-cell methylome and transcriptome analysis
Source: Springer Nature journal article supplement (doi:10.1038/s41596-021-00571-9), 2021-07-09
Supplement: MOESM2 [file 41596_2021_571_MOESM2_ESM13.xlsx]

## Sheet: RRBS adapter oligos
RRBS Adapter	Top oligo (original Msc-RRBS oligo number)	Top oligo sequence (5' -> 3')	Top oligo in IDT ordering format	Inline Barcode	Bottom oligo (original Msc-RRBS oligo number)	Bottom oligo sequence (5' -> 3')	Bottom oligo in IDT ordering format
1	Msc-RRBS-Top-1	CTACACGACGCTCTTCCGATCTACAACC*T	/5Me-dC/TA/iMe-dC/A/iMe-dC/GA/iMe-dC/G/iMe-dC/T/iMe-dC/TT/iMe-dC//iMe-dC/GAT/iMe-dC/TA/iMe-dC/AA/iMe-dC//iMe-dC/*T	ACAACC	Msc-RRBS-Bot-1	/5Phos/GGTTGTAGATCGGAAGAGCACACGTCTGAAC	/5Phos/GGTTGTAGAT/iMe-dC/GGAAGAG/iMe-dC/A/iMe-dC/A/iMe-dC/GT/iMe-dC/TGAA/3Me-dC/
2	Msc-RRBS-Top-4	CTACACGACGCTCTTCCGATCTACTCAC*T	/5Me-dC/TA/iMe-dC/A/iMe-dC/GA/iMe-dC/G/iMe-dC/T/iMe-dC/TT/iMe-dC//iMe-dC/GAT/iMe-dC/TA/iMe-dC/T/iMe-dC/A/iMe-dC/*T	ACTCAC	Msc-RRBS-Bot-4	/5Phos/GTGAGTAGATCGGAAGAGCACACGTCTGAAC	/5Phos/GTGAGTAGAT/iMe-dC/GGAAGAG/iMe-dC/A/iMe-dC/A/iMe-dC/GT/iMe-dC/TGAA/3Me-dC/
3	Msc-RRBS-Top-5	CTACACGACGCTCTTCCGATCTAGGATG*T	/5Me-dC/TA/iMe-dC/A/iMe-dC/GA/iMe-dC/G/iMe-dC/T/iMe-dC/TT/iMe-dC//iMe-dC/GAT/iMe-dC/TAGGATG*T	AGGATG	Msc-RRBS-Bot-5	/5Phos/CATCCTAGATCGGAAGAGCACACGTCTGAAC	/5Phos//iMe-dC/AT/iMe-dC//iMe-dC/TAGAT/iMe-dC/GGAAGAG/iMe-dC/A/iMe-dC/A/iMe-dC/GT/iMe-dC/TGAA/3Me-dC/
4	Msc-RRBS-Top-7	CTACACGACGCTCTTCCGATCTATCGAC*T	/5Me-dC/TA/iMe-dC/A/iMe-dC/GA/iMe-dC/G/iMe-dC/T/iMe-dC/TT/iMe-dC//iMe-dC/GAT/iMe-dC/TAT/iMe-dC/GA/iMe-dC/*T	ATCGAC	Msc-RRBS-Bot-7	/5Phos/GTCGATAGATCGGAAGAGCACACGTCTGAAC	/5Phos/GT/iMe-dC/GATAGAT/iMe-dC/GGAAGAG/iMe-dC/A/iMe-dC/A/iMe-dC/GT/iMe-dC/TGAA/3Me-dC/
5	Msc-RRBS-Top-8	CTACACGACGCTCTTCCGATCTCAAGAG*T	/5Me-dC/TA/iMe-dC/A/iMe-dC/GA/iMe-dC/G/iMe-dC/T/iMe-dC/TT/iMe-dC//iMe-dC/GAT/iMe-dC/T/iMe-dC/AAGAG*T	CAAGAG	Msc-RRBS-Bot-8	/5Phos/CTCTTGAGATCGGAAGAGCACACGTCTGAAC	/5Phos//iMe-dC/T/iMe-dC/TTGAGAT/iMe-dC/GGAAGAG/iMe-dC/A/iMe-dC/A/iMe-dC/GT/iMe-dC/TGAA/3Me-dC/
6	Msc-RRBS-Top-9	CTACACGACGCTCTTCCGATCTCATGAC*T	/5Me-dC/TA/iMe-dC/A/iMe-dC/GA/iMe-dC/G/iMe-dC/T/iMe-dC/TT/iMe-dC//iMe-dC/GAT/iMe-dC/T/iMe-dC/ATGA/iMe-dC/*T	CATGAC	Msc-RRBS-Bot-9	/5Phos/GTCATGAGATCGGAAGAGCACACGTCTGAAC	/5Phos/GT/iMe-dC/ATGAGAT/iMe-dC/GGAAGAG/iMe-dC/A/iMe-dC/A/iMe-dC/GT/iMe-dC/TGAA/3Me-dC/
7	Msc-RRBS-Top-10	CTACACGACGCTCTTCCGATCTCCTTCG*T	/5Me-dC/TA/iMe-dC/A/iMe-dC/GA/iMe-dC/G/iMe-dC/T/iMe-dC/TT/iMe-dC//iMe-dC/GAT/iMe-dC/T/iMe-dC//iMe-dC/TT/iMe-dC/G*T	CCTTCG	Msc-RRBS-Bot-10	/5Phos/CGAAGGAGATCGGAAGAGCACACGTCTGAAC	/5Phos//iMe-dC/GAAGGAGAT/iMe-dC/GGAAGAG/iMe-dC/A/iMe-dC/A/iMe-dC/GT/iMe-dC/TGAA/3Me-dC/
8	Msc-RRBS-Top-11	CTACACGACGCTCTTCCGATCTCGGTAG*T	/5Me-dC/TA/iMe-dC/A/iMe-dC/GA/iMe-dC/G/iMe-dC/T/iMe-dC/TT/iMe-dC//iMe-dC/GAT/iMe-dC/T/iMe-dC/GGTAG*T	CGGTAG	Msc-RRBS-Bot-11	/5Phos/CTACCGAGATCGGAAGAGCACACGTCTGAAC	/5Phos//iMe-dC/TA/iMe-dC//iMe-dC/GAGAT/iMe-dC/GGAAGAG/iMe-dC/A/iMe-dC/A/iMe-dC/GT/iMe-dC/TGAA/3Me-dC/
9	Msc-RRBS-Top-12	CTACACGACGCTCTTCCGATCTCTATTG*T	/5Me-dC/TA/iMe-dC/A/iMe-dC/GA/iMe-dC/G/iMe-dC/T/iMe-dC/TT/iMe-dC//iMe-dC/GAT/iMe-dC/T/iMe-dC/TATTG*T	CTATTG	Msc-RRBS-Bot-12	/5Phos/CAATAGAGATCGGAAGAGCACACGTCTGAAC	/5Phos//iMe-dC/AATAGAGAT/iMe-dC/GGAAGAG/iMe-dC/A/iMe-dC/A/iMe-dC/GT/iMe-dC/TGAA/3Me-dC/
10	Msc-RRBS-Top-13	CTACACGACGCTCTTCCGATCTCTCAGC*T	/5Me-dC/TA/iMe-dC/A/iMe-dC/GA/iMe-dC/G/iMe-dC/T/iMe-dC/TT/iMe-dC//iMe-dC/GAT/iMe-dC/T/iMe-dC/T/iMe-dC/AG/iMe-dC/*T	CTCAGC	Msc-RRBS-Bot-13	/5Phos/GCTGAGAGATCGGAAGAGCACACGTCTGAAC	/5Phos/G/iMe-dC/TGAGAGAT/iMe-dC/GGAAGAG/iMe-dC/A/iMe-dC/A/iMe-dC/GT/iMe-dC/TGAA/3Me-dC/
11	Msc-RRBS-Top-15	CTACACGACGCTCTTCCGATCTGCATTC*T	/5Me-dC/TA/iMe-dC/A/iMe-dC/GA/iMe-dC/G/iMe-dC/T/iMe-dC/TT/iMe-dC//iMe-dC/GAT/iMe-dC/TG/iMe-dC/ATT/iMe-dC/*T	GCATTC	Msc-RRBS-Bot-15	/5Phos/GAATGCAGATCGGAAGAGCACACGTCTGAAC	/5Phos/GAATG/iMe-dC/AGAT/iMe-dC/GGAAGAG/iMe-dC/A/iMe-dC/A/iMe-dC/GT/iMe-dC/TGAA/3Me-dC/
12	Msc-RRBS-Top-18	CTACACGACGCTCTTCCGATCTGTGAGG*T	/5Me-dC/TA/iMe-dC/A/iMe-dC/GA/iMe-dC/G/iMe-dC/T/iMe-dC/TT/iMe-dC//iMe-dC/GAT/iMe-dC/TGTGAGG*T	GTGAGG	Msc-RRBS-Bot-18	/5Phos/CCTCACAGATCGGAAGAGCACACGTCTGAAC	/5Phos//iMe-dC//iMe-dC/T/iMe-dC/A/iMe-dC/AGAT/iMe-dC/GGAAGAG/iMe-dC/A/iMe-dC/A/iMe-dC/GT/iMe-dC/TGAA/3Me-dC/
13	Msc-RRBS-Top-19	CTACACGACGCTCTTCCGATCTGTTGAG*T	/5Me-dC/TA/iMe-dC/A/iMe-dC/GA/iMe-dC/G/iMe-dC/T/iMe-dC/TT/iMe-dC//iMe-dC/GAT/iMe-dC/TGTTGAG*T	GTTGAG	Msc-RRBS-Bot-19	/5Phos/CTCAACAGATCGGAAGAGCACACGTCTGAAC	/5Phos//iMe-dC/T/iMe-dC/AA/iMe-dC/AGAT/iMe-dC/GGAAGAG/iMe-dC/A/iMe-dC/A/iMe-dC/GT/iMe-dC/TGAA/3Me-dC/
14	Msc-RRBS-Top-21	CTACACGACGCTCTTCCGATCTTATCTC*T	/5Me-dC/TA/iMe-dC/A/iMe-dC/GA/iMe-dC/G/iMe-dC/T/iMe-dC/TT/iMe-dC//iMe-dC/GAT/iMe-dC/TTAT/iMe-dC/T/iMe-dC/*T	TATCTC	Msc-RRBS-Bot-21	/5Phos/GAGATAAGATCGGAAGAGCACACGTCTGAAC	/5Phos/GAGATAAGAT/iMe-dC/GGAAGAG/iMe-dC/A/iMe-dC/A/iMe-dC/GT/iMe-dC/TGAA/3Me-dC/
15	Msc-RRBS-Top-22	CTACACGACGCTCTTCCGATCTTCTCTG*T	/5Me-dC/TA/iMe-dC/A/iMe-dC/GA/iMe-dC/G/iMe-dC/T/iMe-dC/TT/iMe-dC//iMe-dC/GAT/iMe-dC/TT/iMe-dC/T/iMe-dC/TG*T	TCTCTG	Msc-RRBS-Bot-22	/5Phos/CAGAGAAGATCGGAAGAGCACACGTCTGAAC	/5Phos//iMe-dC/AGAGAAGAT/iMe-dC/GGAAGAG/iMe-dC/A/iMe-dC/A/iMe-dC/GT/iMe-dC/TGAA/3Me-dC/
16	Msc-RRBS-Top-23	CTACACGACGCTCTTCCGATCTTGACAG*T	/5Me-dC/TA/iMe-dC/A/iMe-dC/GA/iMe-dC/G/iMe-dC/T/iMe-dC/TT/iMe-dC//iMe-dC/GAT/iMe-dC/TTGA/iMe-dC/AG*T	TGACAG	Msc-RRBS-Bot-23	/5Phos/CTGTCAAGATCGGAAGAGCACACGTCTGAAC	/5Phos//iMe-dC/TGT/iMe-dC/AAGAT/iMe-dC/GGAAGAG/iMe-dC/A/iMe-dC/A/iMe-dC/GT/iMe-dC/TGAA/3Me-dC/
17	Msc-RRBS-Top-24	CTACACGACGCTCTTCCGATCTTGCTGC*T	/5Me-dC/TA/iMe-dC/A/iMe-dC/GA/iMe-dC/G/iMe-dC/T/iMe-dC/TT/iMe-dC//iMe-dC/GAT/iMe-dC/TTG/iMe-dC/TG/iMe-dC/*T	TGCTGC	Msc-RRBS-Bot-24	/5Phos/GCAGCAAGATCGGAAGAGCACACGTCTGAAC	/5Phos/G/iMe-dC/AG/iMe-dC/AAGAT/iMe-dC/GGAAGAG/iMe-dC/A/iMe-dC/A/iMe-dC/GT/iMe-dC/TGAA/3Me-dC/
18	Msc-RRBS-Top-26	CTACACGACGCTCTTCCGATCTACAGAC*T	/5Me-dC/TA/iMe-dC/A/iMe-dC/GA/iMe-dC/G/iMe-dC/T/iMe-dC/TT/iMe-dC//iMe-dC/GAT/iMe-dC/TA/iMe-dC/AGA/iMe-dC/*T	ACAGAC	Msc-RRBS-Bot-26	/5Phos/GTCTGTAGATCGGAAGAGCACACGTCTGAAC	/5Phos/GT/iMe-dC/TGTAGAT/iMe-dC/GGAAGAG/iMe-dC/A/iMe-dC/A/iMe-dC/GT/iMe-dC/TGAA/3Me-dC/
19	Msc-RRBS-Top-28	CTACACGACGCTCTTCCGATCTAGAAGG*T	/5Me-dC/TA/iMe-dC/A/iMe-dC/GA/iMe-dC/G/iMe-dC/T/iMe-dC/TT/iMe-dC//iMe-dC/GAT/iMe-dC/TAGAAGG*T	AGAAGG	Msc-RRBS-Bot-28	/5Phos/CCTTCTAGATCGGAAGAGCACACGTCTGAAC	/5Phos//iMe-dC//iMe-dC/TT/iMe-dC/TAGAT/iMe-dC/GGAAGAG/iMe-dC/A/iMe-dC/A/iMe-dC/GT/iMe-dC/TGAA/3Me-dC/
20	Msc-RRBS-Top-31	CTACACGACGCTCTTCCGATCTATCAAG*T	/5Me-dC/TA/iMe-dC/A/iMe-dC/GA/iMe-dC/G/iMe-dC/T/iMe-dC/TT/iMe-dC//iMe-dC/GAT/iMe-dC/TAT/iMe-dC/AAG*T	ATCAAG	Msc-RRBS-Bot-31	/5Phos/CTTGATAGATCGGAAGAGCACACGTCTGAAC	/5Phos//iMe-dC/TTGATAGAT/iMe-dC/GGAAGAG/iMe-dC/A/iMe-dC/A/iMe-dC/GT/iMe-dC/TGAA/3Me-dC/
21	Msc-RRBS-Top-34	CTACACGACGCTCTTCCGATCTCCATAG*T	/5Me-dC/TA/iMe-dC/A/iMe-dC/GA/iMe-dC/G/iMe-dC/T/iMe-dC/TT/iMe-dC//iMe-dC/GAT/iMe-dC/T/iMe-dC//iMe-dC/ATAG*T	CCATAG	Msc-RRBS-Bot-34	/5Phos/CTATGGAGATCGGAAGAGCACACGTCTGAAC	/5Phos//iMe-dC/TATGGAGAT/iMe-dC/GGAAGAG/iMe-dC/A/iMe-dC/A/iMe-dC/GT/iMe-dC/TGAA/3Me-dC/
22	Msc-RRBS-Top-38	CTACACGACGCTCTTCCGATCTGAAGTC*T	/5Me-dC/TA/iMe-dC/A/iMe-dC/GA/iMe-dC/G/iMe-dC/T/iMe-dC/TT/iMe-dC//iMe-dC/GAT/iMe-dC/TGAAGT/iMe-dC/*T	GAAGTC	Msc-RRBS-Bot-38	/5Phos/GACTTCAGATCGGAAGAGCACACGTCTGAAC	/5Phos/GA/iMe-dC/TT/iMe-dC/AGAT/iMe-dC/GGAAGAG/iMe-dC/A/iMe-dC/A/iMe-dC/GT/iMe-dC/TGAA/3Me-dC/
23	Msc-RRBS-Top-40	CTACACGACGCTCTTCCGATCTGGTAAC*T	/5Me-dC/TA/iMe-dC/A/iMe-dC/GA/iMe-dC/G/iMe-dC/T/iMe-dC/TT/iMe-dC//iMe-dC/GAT/iMe-dC/TGGTAA/iMe-dC/*T	GGTAAC	Msc-RRBS-Bot-40	/5Phos/GTTACCAGATCGGAAGAGCACACGTCTGAAC	/5Phos/GTTA/iMe-dC//iMe-dC/AGAT/iMe-dC/GGAAGAG/iMe-dC/A/iMe-dC/A/iMe-dC/GT/iMe-dC/TGAA/3Me-dC/
24	Msc-RRBS-Top-48	CTACACGACGCTCTTCCGATCTTGTAGG*T	/5Me-dC/TA/iMe-dC/A/iMe-dC/GA/iMe-dC/G/iMe-dC/T/iMe-dC/TT/iMe-dC//iMe-dC/GAT/iMe-dC/TTGTAGG*T	TGTAGG	Msc-RRBS-Bot-48	/5Phos/CCTACAAGATCGGAAGAGCACACGTCTGAAC	/5Phos//iMe-dC//iMe-dC/TA/iMe-dC/AAGAT/iMe-dC/GGAAGAG/iMe-dC/A/iMe-dC/A/iMe-dC/GT/iMe-dC/TGAA/3Me-dC/
	Note	1. All cytosines (Cs) should be methylated cytosines (5mC)
		2. * Phosphorothioate linkage
		3. Scale--100 nmole scale
		4. Purification--standard deslting
