# Supplementary material for: Smart-RRBS for single-cell methylome and transcriptome analysis
Source: Springer Nature journal article supplement (doi:10.1038/s41596-021-00571-9), 2021-07-09
Supplement: MOESM3 [file 41596_2021_571_MOESM3_ESM14.xlsx]

## Sheet: UDI RRBS PCR primers
UDI	Primer name	Sequence (5' -> 3')	index in primer	i7 index for sample sheet	i5 index for NovaSeq	i5 index for HiSeq 4000/X
UDP1	Msc-RRBS-F-UDP1	AATGATACGGCGACCACCGAGATCTACACTCGTGGAGCGACACTCTTTCCCTACACGACGCTCTTCCGATCT	TCGTGGAGCG	GAACTGAGCG	TCGTGGAGCG	CGCTCCACGA
	Msc-RRBS-R-UDP1	CAAGCAGAAGACGGCATACGAGATCGCTCAGTTCGTGACTGGAGTTCAGACGTGTGCTCTTCCGATCT	CGCTCAGTTC
UDP2	Msc-RRBS-F-UDP2	AATGATACGGCGACCACCGAGATCTACACCTACAAGATAACACTCTTTCCCTACACGACGCTCTTCCGATCT	CTACAAGATA	AGGTCAGATA	CTACAAGATA	TATCTTGTAG
	Msc-RRBS-R-UDP2	CAAGCAGAAGACGGCATACGAGATTATCTGACCTGTGACTGGAGTTCAGACGTGTGCTCTTCCGATCT	TATCTGACCT
UDP3	Msc-RRBS-F-UDP3	AATGATACGGCGACCACCGAGATCTACACTATAGTAGCTACACTCTTTCCCTACACGACGCTCTTCCGATCT	TATAGTAGCT	CGTCTCATAT	TATAGTAGCT	AGCTACTATA
	Msc-RRBS-R-UDP3	CAAGCAGAAGACGGCATACGAGATATATGAGACGGTGACTGGAGTTCAGACGTGTGCTCTTCCGATCT	ATATGAGACG
UDP4	Msc-RRBS-F-UDP4	AATGATACGGCGACCACCGAGATCTACACTGCCTGGTGGACACTCTTTCCCTACACGACGCTCTTCCGATCT	TGCCTGGTGG	ATTCCATAAG	TGCCTGGTGG	CCACCAGGCA
	Msc-RRBS-R-UDP4	CAAGCAGAAGACGGCATACGAGATCTTATGGAATGTGACTGGAGTTCAGACGTGTGCTCTTCCGATCT	CTTATGGAAT
UDP5	Msc-RRBS-F-UDP5	AATGATACGGCGACCACCGAGATCTACACACATTATCCTACACTCTTTCCCTACACGACGCTCTTCCGATCT	ACATTATCCT	GACGAGATTA	ACATTATCCT	AGGATAATGT
	Msc-RRBS-R-UDP5	CAAGCAGAAGACGGCATACGAGATTAATCTCGTCGTGACTGGAGTTCAGACGTGTGCTCTTCCGATCT	TAATCTCGTC
UDP6	Msc-RRBS-F-UDP6	AATGATACGGCGACCACCGAGATCTACACGTCCACTTGTACACTCTTTCCCTACACGACGCTCTTCCGATCT	GTCCACTTGT	AACATCGCGC	GTCCACTTGT	ACAAGTGGAC
	Msc-RRBS-R-UDP6	CAAGCAGAAGACGGCATACGAGATGCGCGATGTTGTGACTGGAGTTCAGACGTGTGCTCTTCCGATCT	GCGCGATGTT
UDP7	Msc-RRBS-F-UDP7	AATGATACGGCGACCACCGAGATCTACACTGGAACAGTAACACTCTTTCCCTACACGACGCTCTTCCGATCT	TGGAACAGTA	CTAGTGCTCT	TGGAACAGTA	TACTGTTCCA
	Msc-RRBS-R-UDP7	CAAGCAGAAGACGGCATACGAGATAGAGCACTAGGTGACTGGAGTTCAGACGTGTGCTCTTCCGATCT	AGAGCACTAG
UDP8	Msc-RRBS-F-UDP8	AATGATACGGCGACCACCGAGATCTACACCCTTGTTAATACACTCTTTCCCTACACGACGCTCTTCCGATCT	CCTTGTTAAT	GATCAAGGCA	CCTTGTTAAT	ATTAACAAGG
	Msc-RRBS-R-UDP8	CAAGCAGAAGACGGCATACGAGATTGCCTTGATCGTGACTGGAGTTCAGACGTGTGCTCTTCCGATCT	TGCCTTGATC
UDP9	Msc-RRBS-F-UDP9	AATGATACGGCGACCACCGAGATCTACACGTTGATAGTGACACTCTTTCCCTACACGACGCTCTTCCGATCT	GTTGATAGTG	GACTGAGTAG	GTTGATAGTG	CACTATCAAC
	Msc-RRBS-R-UDP9	CAAGCAGAAGACGGCATACGAGATCTACTCAGTCGTGACTGGAGTTCAGACGTGTGCTCTTCCGATCT	CTACTCAGTC
UDP10	Msc-RRBS-F-UDP10	AATGATACGGCGACCACCGAGATCTACACACCAGCGACAACACTCTTTCCCTACACGACGCTCTTCCGATCT	ACCAGCGACA	AGTCAGACGA	ACCAGCGACA	TGTCGCTGGT
	Msc-RRBS-R-UDP10	CAAGCAGAAGACGGCATACGAGATTCGTCTGACTGTGACTGGAGTTCAGACGTGTGCTCTTCCGATCT	TCGTCTGACT
UDP11	Msc-RRBS-F-UDP11	AATGATACGGCGACCACCGAGATCTACACCATACACTGTACACTCTTTCCCTACACGACGCTCTTCCGATCT	CATACACTGT	CCGTATGTTC	CATACACTGT	ACAGTGTATG
	Msc-RRBS-R-UDP11	CAAGCAGAAGACGGCATACGAGATGAACATACGGGTGACTGGAGTTCAGACGTGTGCTCTTCCGATCT	GAACATACGG
UDP12	Msc-RRBS-F-UDP12	AATGATACGGCGACCACCGAGATCTACACGTGTGGCGCTACACTCTTTCCCTACACGACGCTCTTCCGATCT	GTGTGGCGCT	GAGTCATAGG	GTGTGGCGCT	AGCGCCACAC
	Msc-RRBS-R-UDP12	CAAGCAGAAGACGGCATACGAGATCCTATGACTCGTGACTGGAGTTCAGACGTGTGCTCTTCCGATCT	CCTATGACTC
UDP13	Msc-RRBS-F-UDP13	AATGATACGGCGACCACCGAGATCTACACATCACGAAGGACACTCTTTCCCTACACGACGCTCTTCCGATCT	ATCACGAAGG	CTTGCCATTA	ATCACGAAGG	CCTTCGTGAT
	Msc-RRBS-R-UDP13	CAAGCAGAAGACGGCATACGAGATTAATGGCAAGGTGACTGGAGTTCAGACGTGTGCTCTTCCGATCT	TAATGGCAAG
UDP14	Msc-RRBS-F-UDP14	AATGATACGGCGACCACCGAGATCTACACCGGCTCTACTACACTCTTTCCCTACACGACGCTCTTCCGATCT	CGGCTCTACT	GAAGCGGCAC	CGGCTCTACT	AGTAGAGCCG
	Msc-RRBS-R-UDP14	CAAGCAGAAGACGGCATACGAGATGTGCCGCTTCGTGACTGGAGTTCAGACGTGTGCTCTTCCGATCT	GTGCCGCTTC
UDP15	Msc-RRBS-F-UDP15	AATGATACGGCGACCACCGAGATCTACACGAATGCACGAACACTCTTTCCCTACACGACGCTCTTCCGATCT	GAATGCACGA	TCCATTGCCG	GAATGCACGA	TCGTGCATTC
	Msc-RRBS-R-UDP15	CAAGCAGAAGACGGCATACGAGATCGGCAATGGAGTGACTGGAGTTCAGACGTGTGCTCTTCCGATCT	CGGCAATGGA
UDP16	Msc-RRBS-F-UDP16	AATGATACGGCGACCACCGAGATCTACACAAGACTATAGACACTCTTTCCCTACACGACGCTCTTCCGATCT	AAGACTATAG	CGGTTACGGC	AAGACTATAG	CTATAGTCTT
	Msc-RRBS-R-UDP16	CAAGCAGAAGACGGCATACGAGATGCCGTAACCGGTGACTGGAGTTCAGACGTGTGCTCTTCCGATCT	GCCGTAACCG

## Sheet: single index RRBS PCR primers
Primer name	Sequence (5' -> 3')	i7 index in primer	i7 index for entry on sample sheet	Nextera DNA i7 index name
Msc-RRBS-F	AATGATACGGCGACCACCGAGATCTACACTCTTTCCCTACACGACGCTCTTCCGATCT
Msc-RRBS-R701	CAAGCAGAAGACGGCATACGAGATTCGCCTTAGTGACTGGAGTTCAGACGTGTGCTCTTCCGATCT	TCGCCTTA	TAAGGCGA	N701
Msc-RRBS-R702	CAAGCAGAAGACGGCATACGAGATCTAGTACGGTGACTGGAGTTCAGACGTGTGCTCTTCCGATCT	CTAGTACG	CGTACTAG	N702
Msc-RRBS-R703	CAAGCAGAAGACGGCATACGAGATTTCTGCCTGTGACTGGAGTTCAGACGTGTGCTCTTCCGATCT	TTCTGCCT	AGGCAGAA	N703
Msc-RRBS-R704	CAAGCAGAAGACGGCATACGAGATGCTCAGGAGTGACTGGAGTTCAGACGTGTGCTCTTCCGATCT	GCTCAGGA	TCCTGAGC	N704
Msc-RRBS-R705	CAAGCAGAAGACGGCATACGAGATAGGAGTCCGTGACTGGAGTTCAGACGTGTGCTCTTCCGATCT	AGGAGTCC	GGACTCCT	N705
Msc-RRBS-R706	CAAGCAGAAGACGGCATACGAGATCATGCCTAGTGACTGGAGTTCAGACGTGTGCTCTTCCGATCT	CATGCCTA	TAGGCATG	N706
Msc-RRBS-R707	CAAGCAGAAGACGGCATACGAGATGTAGAGAGGTGACTGGAGTTCAGACGTGTGCTCTTCCGATCT	GTAGAGAG	CTCTCTAC	N707
Msc-RRBS-R708	CAAGCAGAAGACGGCATACGAGATCCTCTCTGGTGACTGGAGTTCAGACGTGTGCTCTTCCGATCT	CCTCTCTG	CAGAGAGG	N708
Msc-RRBS-R709	CAAGCAGAAGACGGCATACGAGATAGCGTAGCGTGACTGGAGTTCAGACGTGTGCTCTTCCGATCT	AGCGTAGC	GCTACGCT	N709
Msc-RRBS-R710	CAAGCAGAAGACGGCATACGAGATCAGCCTCGGTGACTGGAGTTCAGACGTGTGCTCTTCCGATCT	CAGCCTCG	CGAGGCTG	N710
Msc-RRBS-R711	CAAGCAGAAGACGGCATACGAGATTGCCTCTTGTGACTGGAGTTCAGACGTGTGCTCTTCCGATCT	TGCCTCTT	AAGAGGCA	N711
Msc-RRBS-R712	CAAGCAGAAGACGGCATACGAGATTCCTCTACGTGACTGGAGTTCAGACGTGTGCTCTTCCGATCT	TCCTCTAC	GTAGAGGA	N712
